# Supplementary material for: Investigating the Effects of Sex Hormones on Macrophage Polarization
Source: MDPI journal article supplement (doi:10.3390/ijms25020951), 2024-01-12
Supplement: s1 [file s1]

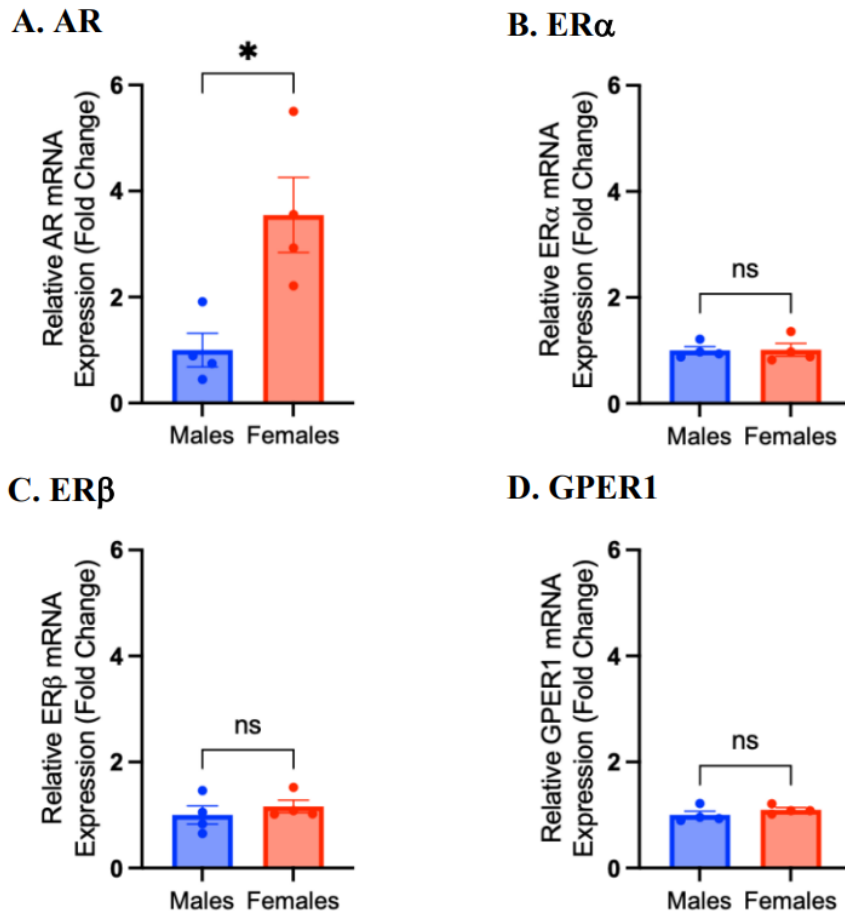

**Supplementary Figure S1: Sex differences in gene expression of sex hormone receptors in BMDMs.**

Bone marrow monocytes from male and female C57BL/6 mice were differentiated into BMDMs. Gene expression of AR, ER $\alpha$ , ER $\beta$ , and GPER1 was quantified by RT-qPCR, as indicated. Data shown represent the mean  $\pm$  SEM fold change ( $2^{-\Delta\Delta Ct}$ ) in receptor expression relative to the reference gene  $\beta$ -actin, normalized to male BMDMs. Two-tailed unpaired t-test was used to evaluate significant differences. (n=4, \* $p$ <0.05, ns - not significant).

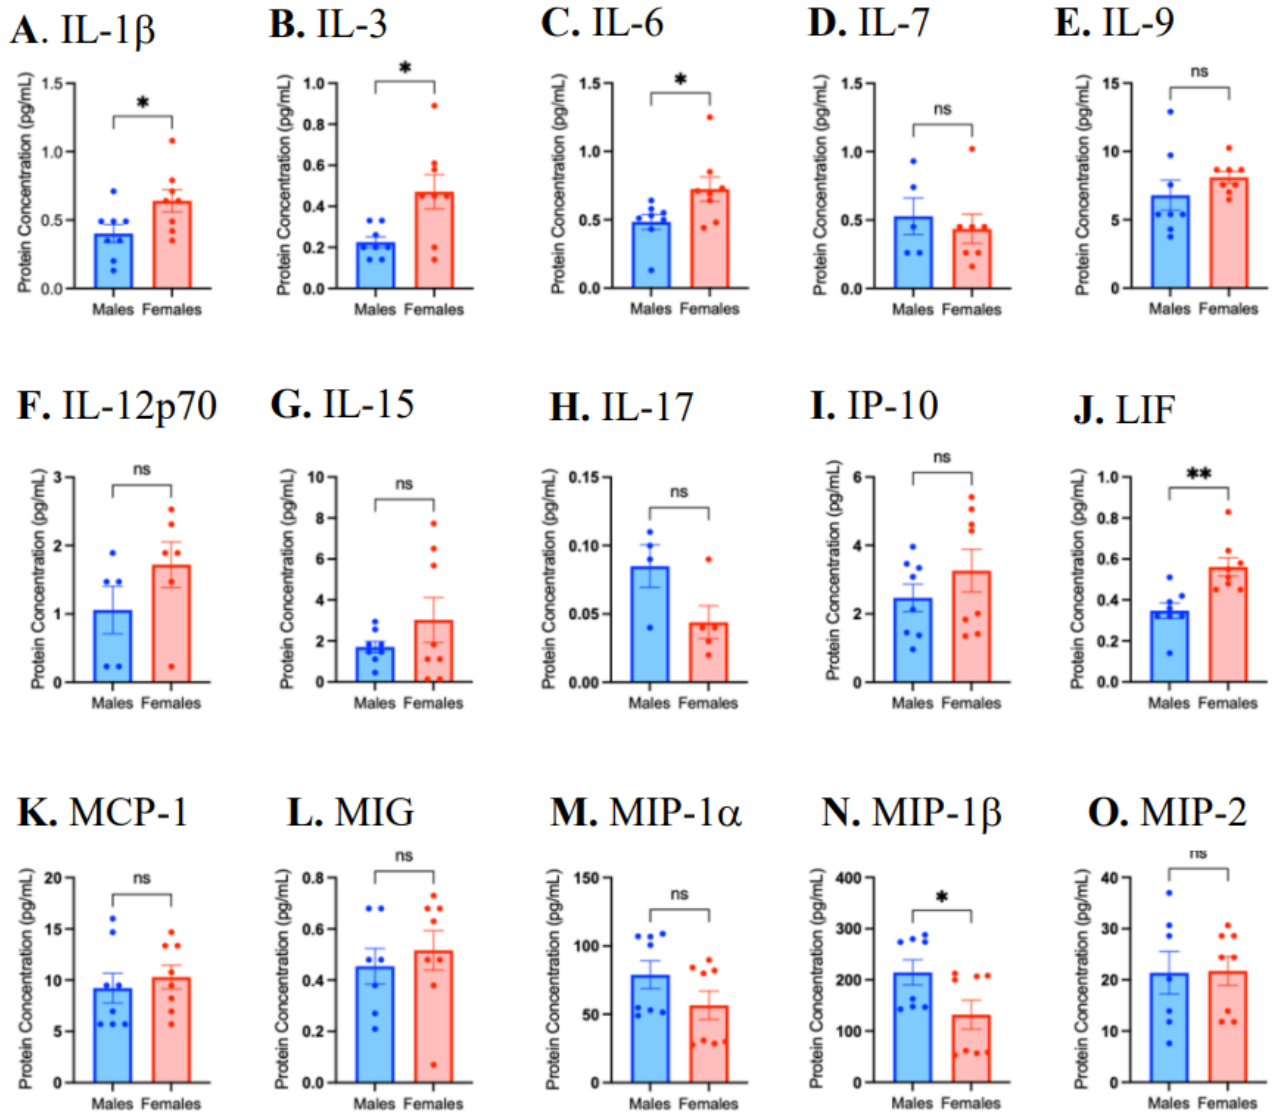

**Supplementary Figure S2: Protein concentration of cytokines and chemokines secreted by unpolarized BMDMs derived from male and female mice.** Bone marrow monocytes were differentiated into BMDMs, and cells were treated with the vehicle control for 24 hours. Data shown represent the mean  $\pm$  SEM protein concentration of secreted cytokines and chemokines from cell culture media of BMDMs derived from male and female mice, quantified by an addressable laser bead immunoassay (ALBIA). Two-tailed unpaired t-test was used to evaluate significant differences. (n=5-8, \* $p$ <0.05, \*\* $p$ <0.01, ns – not significant).

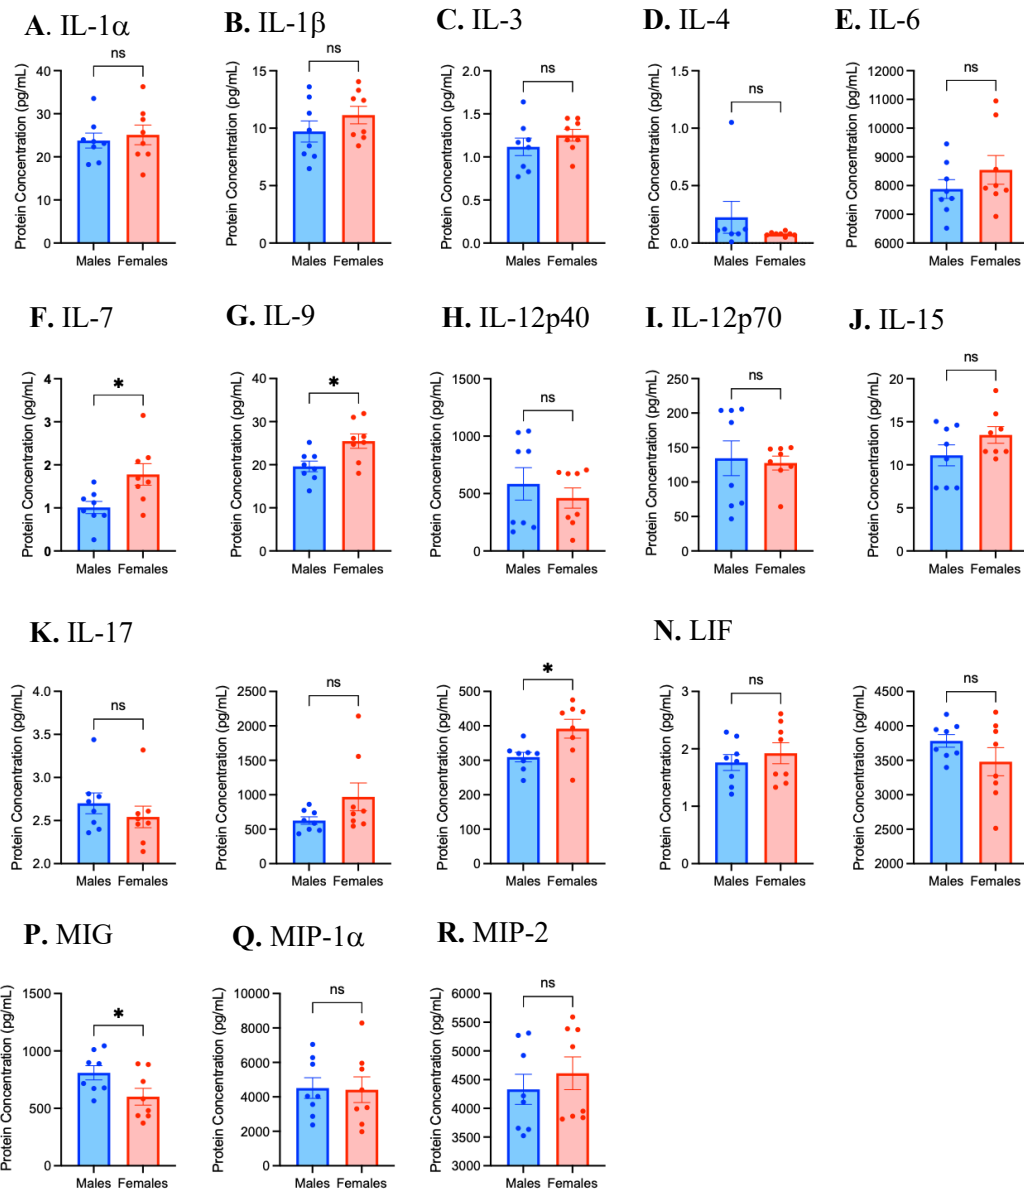

**Supplementary Figure S3: Protein concentration of cytokines and chemokines secreted by pro-inflammatory BMDMs derived from male and female mice.** Bone marrow monocytes were differentiated into BMDMs, and cells were treated with LPS and IFN $\gamma$  for 24 hours. Data shown represent the mean  $\pm$  SEM protein concentration of secreted cytokines and chemokines from cell culture media of BMDMs, quantified by an addressable laser bead immunoassay (ALBIA). Two-tailed unpaired t-test was used to evaluate significant differences. (n=5-8, \* $p$ <0.05, ns – not significant).

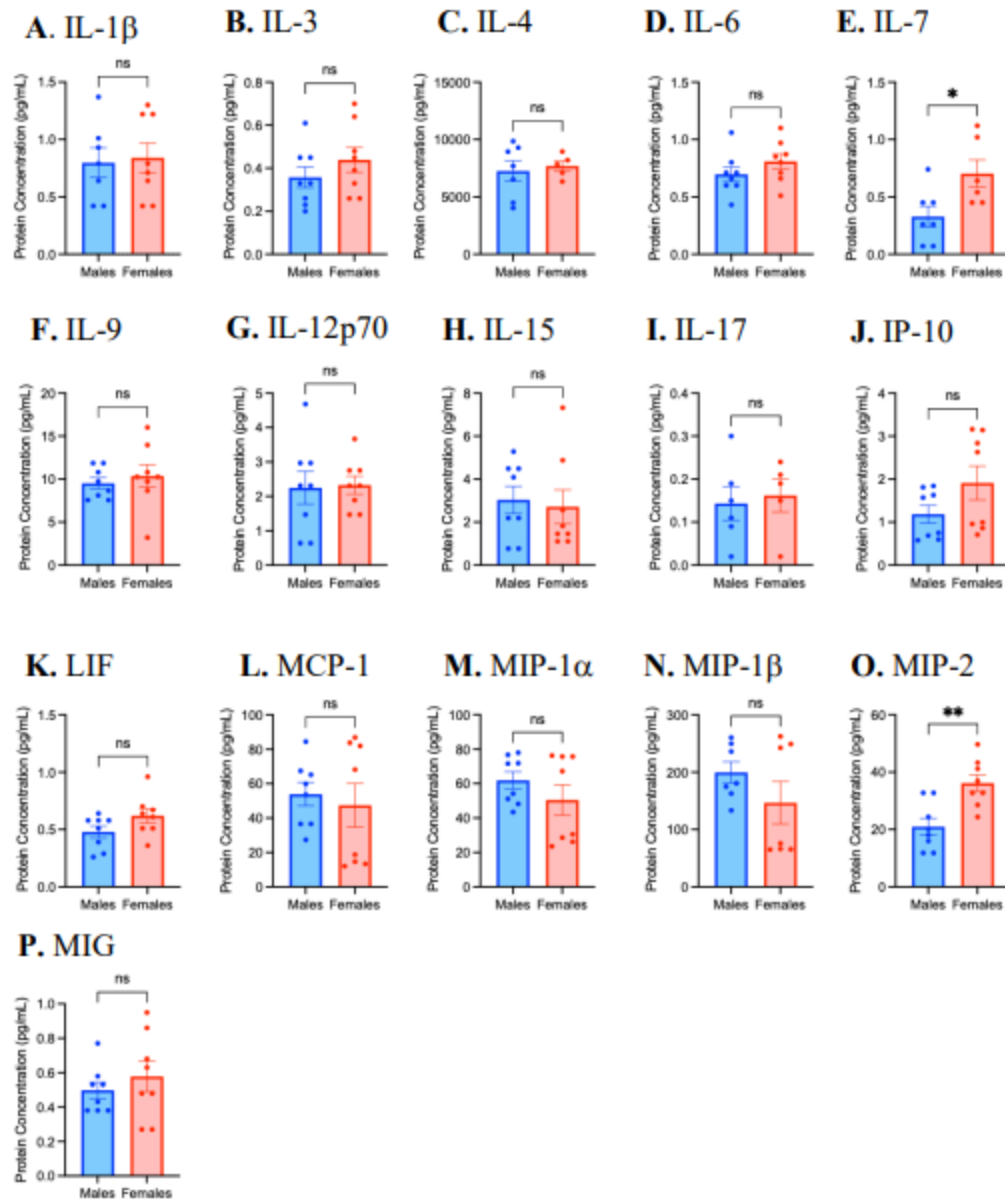

**Supplementary Figure S4: Protein concentration of cytokines and chemokines secreted by anti-inflammatory BMDMs derived from male and female mice.** Bone marrow monocytes were differentiated into BMDMs, and cells were treated with IL-4 for 24 hours. Data shown represent the mean  $\pm$  SEM protein concentration of secreted cytokines and chemokines from cell culture media of BMDMs, quantified by an addressable laser bead immunoassay (ALBIA). Two-tailed unpaired t-test was used to evaluate significant differences. (n=5-8, \* $p$ <0.05, \*\* $p$ <0.01, ns – not significant).

### A. Pro-Inflammatory

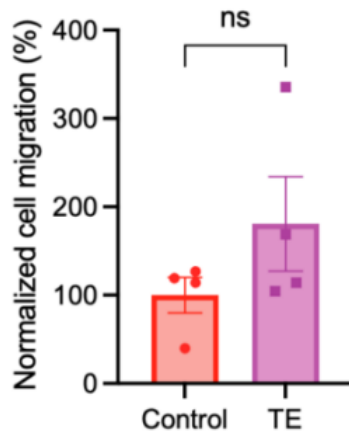

### B. Anti-Inflammatory

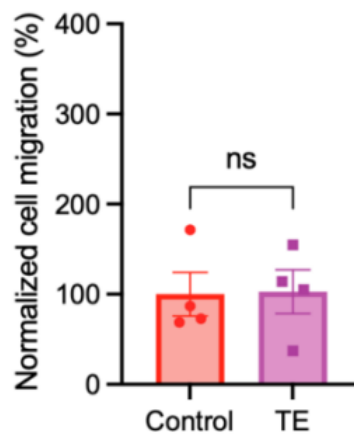

#### Supplementary Figure S5. The effects of 100 nM testosterone (TE) on BMDM migration.

Differentiated BMDMs from female mice were pre-treated with 100 nM TE and polarized to pro- or anti-inflammatory phenotypes. A transwell migration assay was performed with or without chemoattractant CCL19 in culture medium of the lower assay chamber. Data represent the mean  $\pm$  SEM cell migration (%) of A. pro-inflammatory or B. anti-inflammatory BMDMs, normalized to the vehicle-treated control. Two-tailed, unpaired t-tests were performed to evaluate significant differences (n=4, ns – not significant).
